# Supplementary material for: A Critical Gap in Seagrass Protection: Impact of Anthropogenic Off-Shore Nutrient Discharges on Deep Posidonia oceanica Meadows
Source: MDPI journal article supplement (doi:10.3390/plants12030457), 2023-01-19
Supplement: s1 [file s1]

## Supplementary material

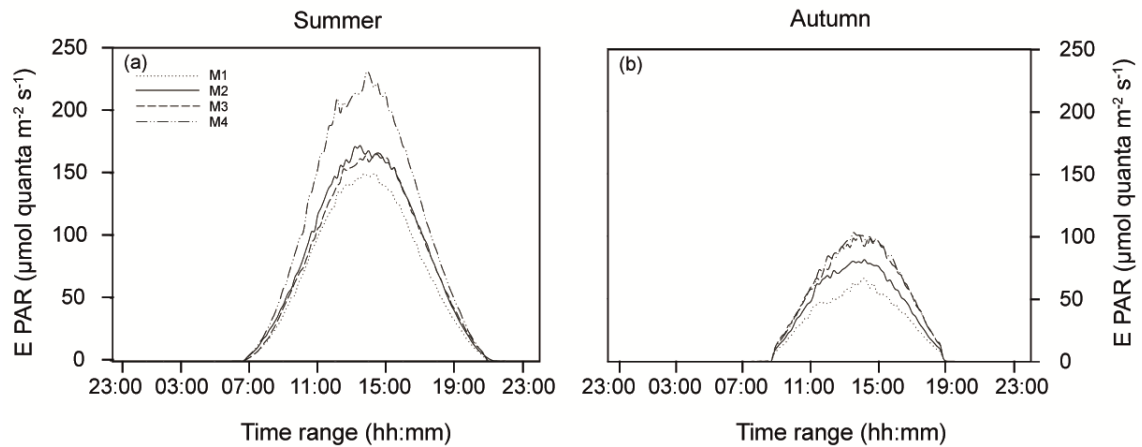

**Figure S1.** Daily PAR irradiance (E PAR; a and b) curves measured at the canopy level at the four sampling sites (M1–M4).

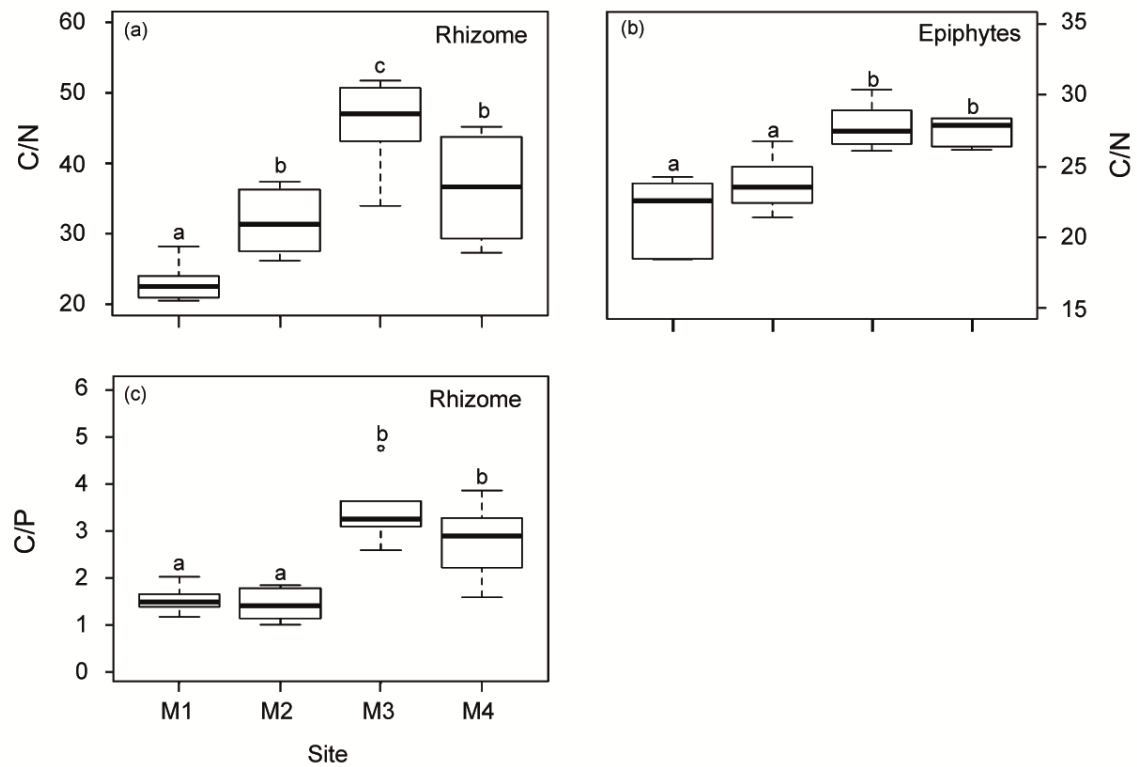

**Figure S2.** C/N ratio (a-b) and C/P ratio (c) measured in epiphytes and/or rhizome in autumn at the four sampling sites (M1–M4). Different letters denote significant differences among sites (Tukey test,  $p < 0.05$ ).

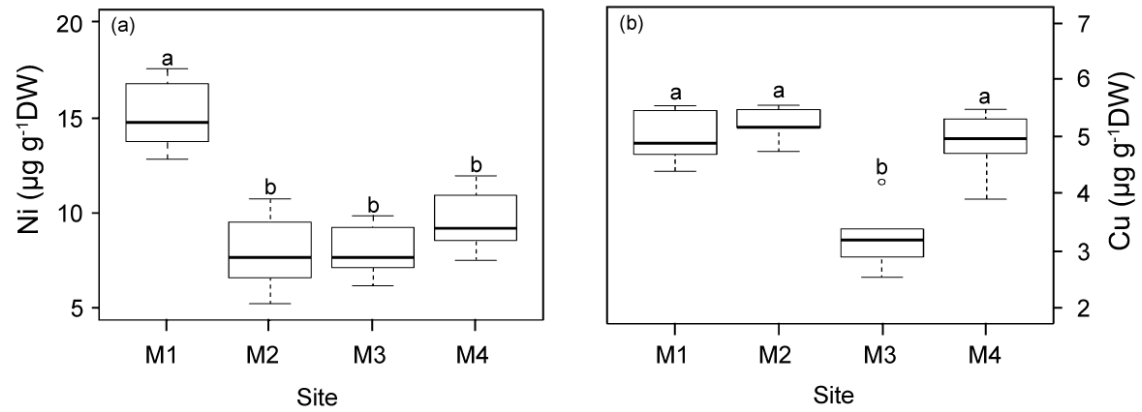

**Figure S3.** Metal content (Ni and Cu; a and b, respectively) measured in the rhizome in autumn at the four sampling sites (M1–M4). Letters denote significant differences among meadows (Tukey test,  $p < 0.05$ ).

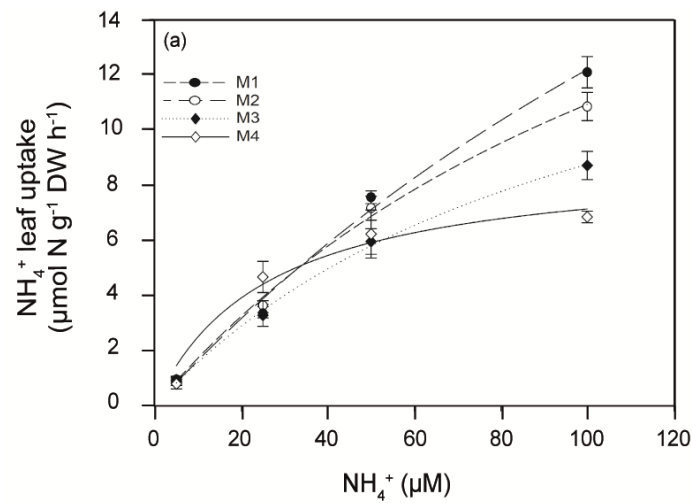

**Figure S4.** Leaf uptake kinetics for  $\text{NH}_4^+$  at increasing concentration determined in *P. oceanica* in autumn at the four sampling sites (M1–M4). Uptake kinetics was adjusted by the Michaelis-Menten model. Values are means ( $n=6$ ) and standard error.

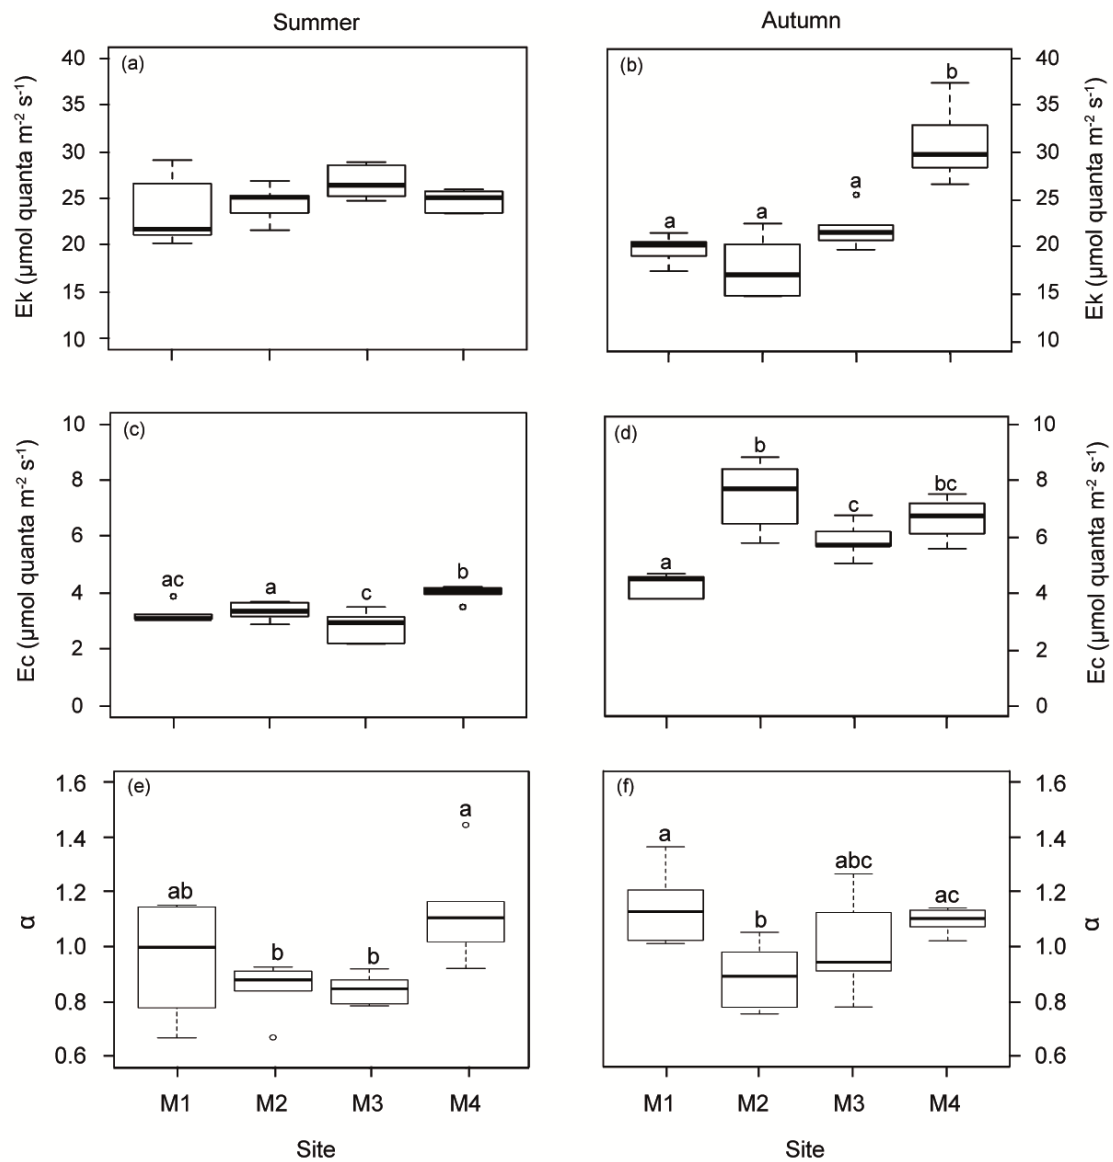

**Figure S5.** Saturation irradiance ( $E_k$ ; a and b), compensation irradiance ( $E_c$ ; c and d) and photosynthetic efficiency ( $\alpha$ ; e and f) in summer and autumn (left and right, respectively) at the four study sites (M1–M4). Different letters denote significant differences among sites (Tukey test,  $p < 0.05$ ).

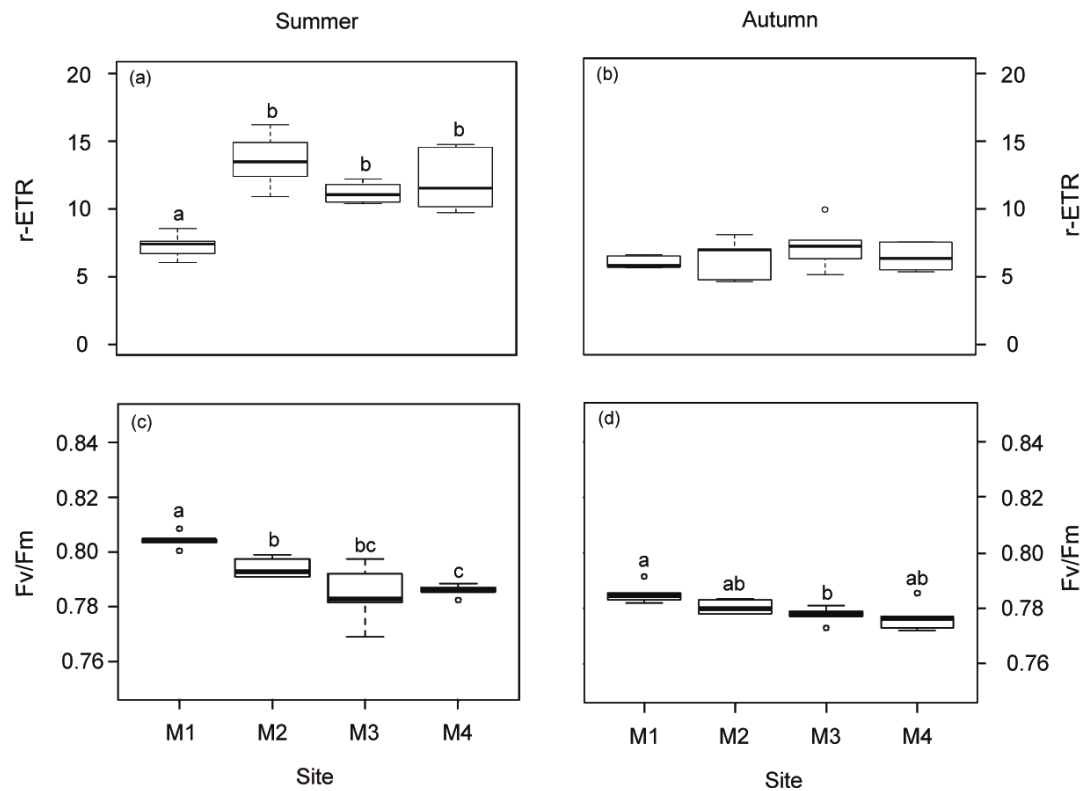

**Figure S6.** Chlorophyll fluorescence emission measured on *P. oceanica* leaves. Relative electron transport rate (r-ETR; a and b) and maximum quantum yield of photosystem II (Fv/Fm; c and d) in summer and autumn (left and right, respectively) at the four study sites (M1–M4). Different letters denote significant differences among sites (Tukey test,  $p < 0.05$ ).

**Table S1.** Percentage of variance explained by axes I and II, and eigenvalues obtained for biotic indicators of external nutrients enrichment, and abiotic factors included in the Principal components analysis (PCA).

| Variance                        | Axis I  | Axis II |
|---------------------------------|---------|---------|
|                                 | 84.80 % | 11.27 % |
| Eigenvalue                      | Axis I  | Axis II |
| Ni                              | -0.5516 | -0.5464 |
| Cu                              | -0.2150 | -0.9070 |
| % P                             | -0.6171 | -0.5445 |
| % N rhizome                     | -0.7142 | -0.6742 |
| $\delta^{15}\text{N}$ rhizome   | -0.9158 | 0.2661  |
| C/N rhizome                     | 0.7255  | 0.6827  |
| N epiphytes                     | -0.9699 | -0.1287 |
| $\delta^{15}\text{N}$ epiphytes | -0.9491 | -0.3112 |
| C/N epiphytes                   | 0.8960  | 0.4384  |
| C/P rhizome                     | 0.7708  | 0.6081  |
| $V_{\max}$                      | -0.9991 | 0.0425  |
| $K_m$                           | -0.9874 | 0.1579  |
| $\alpha_{\text{uptake}}$        | 0.8205  | -0.5708 |
| r-ETR                           | 0.4496  | 0.8932  |
| Fv/Fm                           | -0.9341 | -0.3197 |

|          |         |         |
|----------|---------|---------|
| OM %     | -0.9236 | -0.0961 |
| DPPF     | 0.8438  | 0.2891  |
| Distance | 0.9567  | -0.2477 |
